# Supplementary material
Source: PubMed Central journal article supplement (PMC3697712)
Supplement: JCM.00682-13_zjm999092630so1.pdf [file JCM.00682-13_zjm999092630so1.pdf]

## 1 **Supplemental Material**

### 2 **Organism identification using the VITEK MS v2.0 system**

#### 3 ***Description of the Knowledge Base***

4 The reference database for the VITEK MS system (Knowledge Base) includes  
5 data representing 755 taxa, including 645 bacteria and 110 fungi. Each species  
6 or species group is represented by an average of 10 isolates (range 2 - 475). In  
7 order to capture the degree of acceptable variation within spectra from the same  
8 species, each reference isolate was grown on multiple media types under several  
9 growth conditions. The raw spectra were then acquired by more than one  
10 technician using multiple instruments. This process resulted in an average of 40  
11 reference spectra per species (>30,000 in total).

12

13 For each reference species in the database, baseline correction and de-noising  
14 was performed on the raw spectrum and peak detection was performed to  
15 identify well-defined (significant) peaks. The list of significant peaks was then  
16 subjected to a proprietary process called "mass binning." In this process, the  
17 spectrum between 3,000 and 17,000 Daltons was divided into 1300 pre-defined  
18 intervals called "bins". An algorithm based on supervised machine learning,  
19 known as the "Advanced Spectrum Classifier", was then used to determine how  
20 informative each bin was in differentiating that species from all other species in  
21 the database. For example (Supplemental Figure 1, using hypothetical numbers),  
22 if there were multiple reference spectra for *S. aureus* and nearly all of them  
23 contained a peak in bin 165, but few strains of other species contained a peak in

24 this bin, then a high positive weight (e.g., +14) would be assigned to bin 165 in  
25 the *S. aureus* row of the bin matrix, indicating a peak here is highly specific for *S.*  
26 *aureus*. Similarly, if few of the *S. aureus* strains contained a peak in bin 489, but  
27 many strains of other species contained a peak in this bin, then a strongly  
28 negative weight (e.g., -14) would be assigned to bin 489 of the *S. aureus* row in  
29 the bin matrix, indicating the absence of a peak here is highly specific for *S.*  
30 *aureus*. A neutral (near zero) weight was assigned when the presence or  
31 absence of a peak was not specific to any one species (i.e. bin 1 and bin 742).  
32 This process was replicated for each of the reference species thus creating a  
33 matrix with a species-specific weight for each of the 1300 bins (Supplemental  
34 Figure 2). Finally, as shown by example in Supplemental Figure 3, for each  
35 reference species, a mathematical function (blue curve) was derived from the  
36 distribution of weighted bin scores from all spectra for the given species (red  
37 curve) compared to the distribution of weighted bin scores from all other spectra  
38 in the database (green curve). This function can then take the summed bin score  
39 for an unknown (for example, +1.11) and provide the confidence value for how  
40 similar this score is to the given reference species in the Knowledge Base (in this  
41 case, 99.9%). By examining this function for all claimed species, it was  
42 determined that a threshold of 60% indicates that an unknown isolate's overall  
43 score is within the range of scores generated by known examples of that species,  
44 but is outside the range of scores generated by every other species in the  
45 database.  
46

47 **Spectral analysis for unknown isolates**

48 Once an unknown's raw spectrum is acquired by the mass spectrometer it goes  
49 through pre-processing and mass binning as described above. The bin scores  
50 then go through an iterative process whereby the score within each bin is  
51 multiplied by the weighted bin value for each reference species in the Knowledge  
52 Base. The sum of the weighted bin scores is then calculated and used to  
53 determine the confidence value of the unknown relative to each reference  
54 species. After confidence values are obtained, a decision analysis is performed  
55 to retain only the significant organisms and create the final report to be returned  
56 to the user. This begins by eliminating all species for which the unknown isolate  
57 produced a confidence value less than the 60% threshold. A confidence level  
58 tolerance is then applied to eliminate species with a confidence value "too far"  
59 from species identifications with the highest confidence value. Finally, the  
60 resulting organism(s) is reported. In the event that there are more than four  
61 species on this list or if no species are on the list, a result of "no identification" is  
62 reported. As a hypothetical example (Supplemental Figure 4), given an unknown  
63 with a score of 0.56 in bin 165, 0.3 in bin 238, 0.8 in bin 489, 0.23 in bin 567, and  
64 0 in bin 742, the overall weighted bin score relative to *S. aureus* would be -0.59  
65 giving a confidence value of 36%. Similarly, the overall weighted bin score  
66 relative to *E. coli* would be +1.11 giving a confidence value of 99.9%. Given that  
67 *E. coli* is the only reference species that exceeds the 60% cutoff, the resulting  
68 identification for this unknown would be *E. coli*.

69

# Supplemental Figure 1. Hypothetical Example of creating species specific bin weights using the Advanced Spectral Classifier

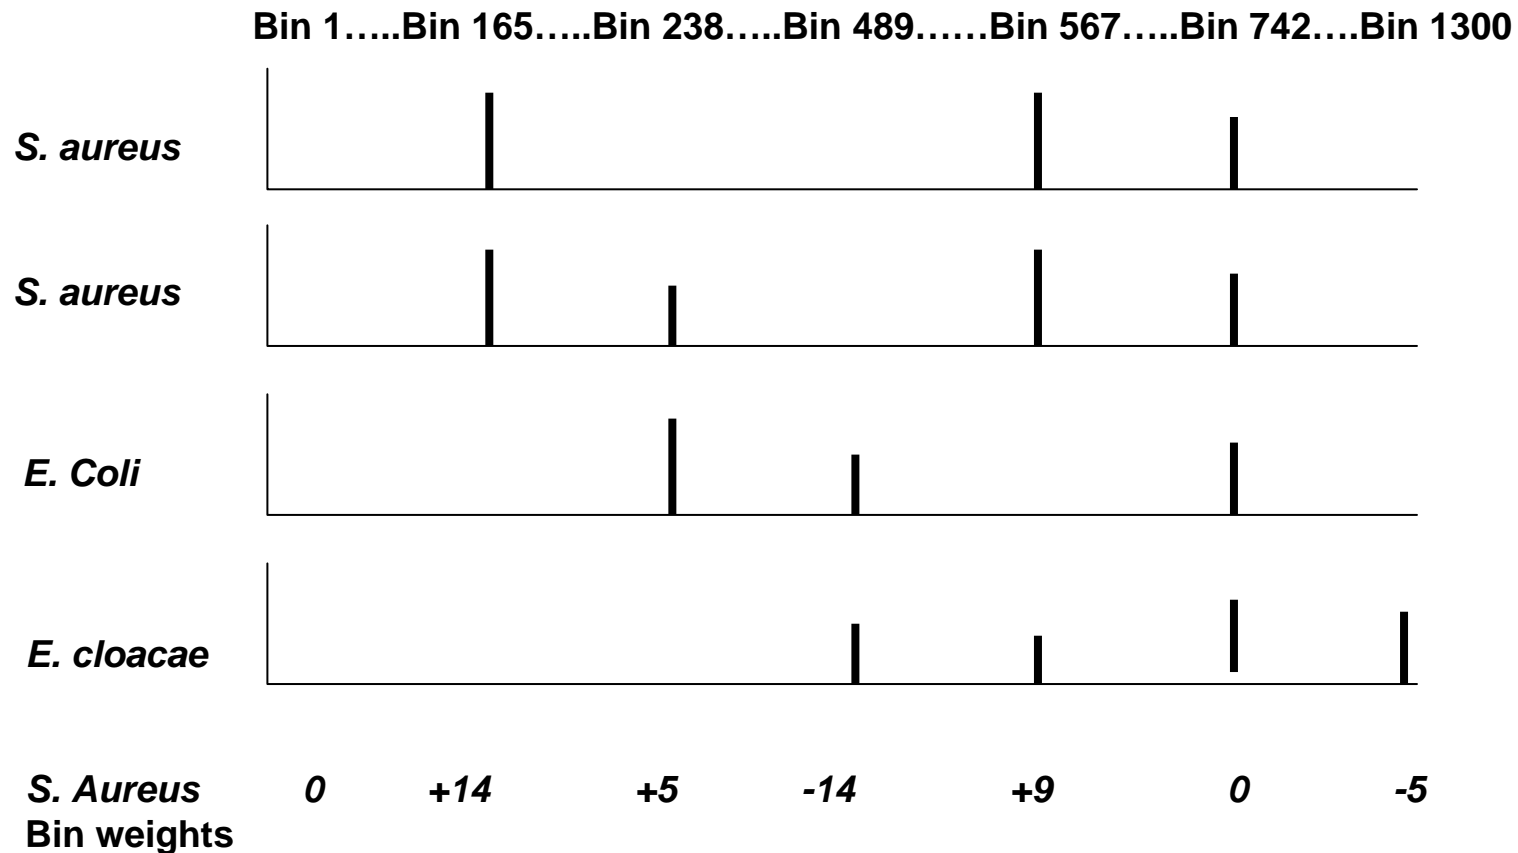

A hypothetical example of how weighted bin scores are calculated for each reference species in the Knowledge Base. Bin weights are calculated based on whether a bin contains (positive weight) or fails to contain (negative weight) peaks for the given reference species. A neutral weight is assigned when the presence or absence of a peak is not specific for any one species. Adapted from: van Nuenen, Marc. VITEK MS: Taking Microbial MALDI-TOF ID from Research into the Routine. Presentation to CDC on August 13, 2012.

## Supplemental Figure 2. Hypothetical Weighted Bin Matrix

|                              | <b>Bin<br/>1</b> | ... | <b>Bin<br/>165</b> | ... | <b>Bin<br/>238</b> | ... | <b>Bin<br/>489</b> | ... | <b>Bin<br/>567</b> | ... | <b>Bin<br/>742</b> | ... | <b>Bin<br/>1300</b> |
|------------------------------|------------------|-----|--------------------|-----|--------------------|-----|--------------------|-----|--------------------|-----|--------------------|-----|---------------------|
| <i>A. defectiva</i>          | 0                |     | -12                |     | 6                  |     | -1                 |     | 8                  |     | 0                  |     | -3                  |
| .                            |                  |     |                    |     |                    |     |                    |     |                    |     |                    |     |                     |
| .                            |                  |     |                    |     |                    |     |                    |     |                    |     |                    |     |                     |
| .                            |                  |     |                    |     |                    |     |                    |     |                    |     |                    |     |                     |
| <i>E. cloacae</i>            | 0                |     | -20                |     | -3                 |     | 7                  |     | 1                  |     | 0                  |     | 20                  |
| <i>E. coli</i>               | 0                |     | -13                |     | 9                  |     | 12                 |     | -17                |     | 0                  |     | -2                  |
| <i>S. aureus</i>             | 0                |     | 14                 |     | 5                  |     | -15                |     | 9                  |     | 0                  |     | -5                  |
| .                            |                  |     |                    |     |                    |     |                    |     |                    |     |                    |     |                     |
| .                            |                  |     |                    |     |                    |     |                    |     |                    |     |                    |     |                     |
| .                            |                  |     |                    |     |                    |     |                    |     |                    |     |                    |     |                     |
| <i>Y. pseudotuberculosis</i> | 0                |     | 17                 |     | 7                  |     | -12                |     | -17                |     | 0                  |     | 6                   |

A hypothetical example of the bin matrix, which is made up of rows containing each reference species in the database and columns containing the calculated weight of the bin for that species. Adapted from: van Nuenen, Marc. VITEK MS: Taking Microbial MALDI-TOF ID from Research into the Routine. Presentation to CDC on August 13, 2012.

### Supplemental Figure 3. Hypothetical Confidence Interval Function

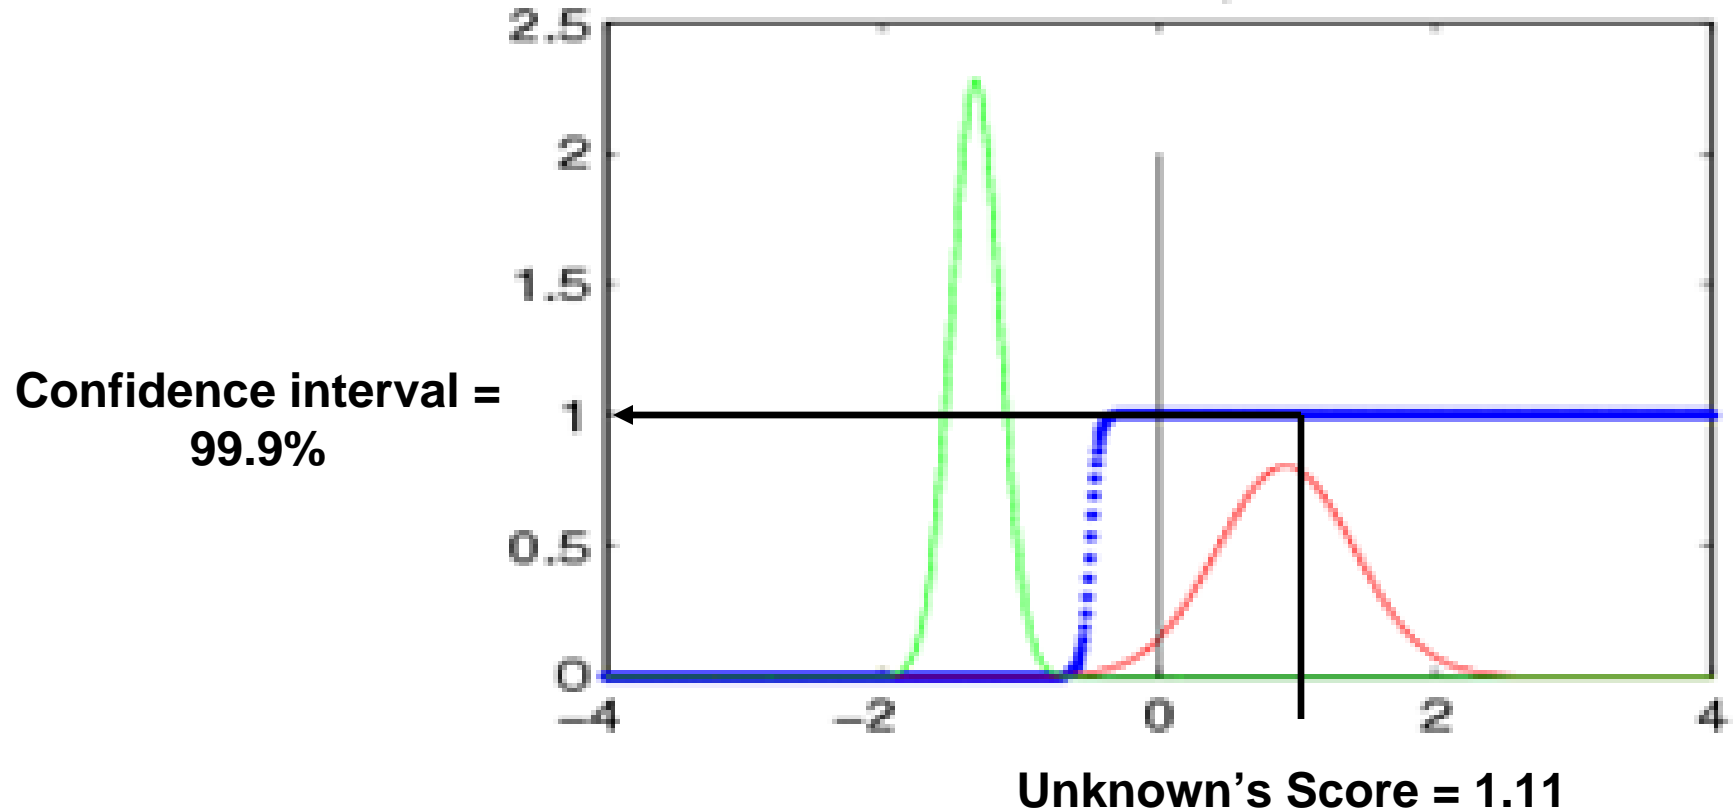

A hypothetical example of the confidence interval function, which is associated with each reference species in the Knowledge Base. The red curve is the distribution of all weighted bin scores from spectra within the given species. The green curve is the distribution of all weighted bin scores from all other spectra in the database. The blue curve is the mathematical function derived from these two curves that allows a confidence value to be determined relative to the summed bin score of an unknown. Adapted from: van Nuenen, Marc. VITEK MS: Taking Microbial MALDI-TOF ID from Research into the Routine. Presentation to CDC on August 13, 2012.

## Supplemental Figure 4. Hypothetical Spectral Analysis Results

| Unknown                      | 0.56        | 0.3         | 0.8         | 0.23        | 0           | Sum          | Confidence    |
|------------------------------|-------------|-------------|-------------|-------------|-------------|--------------|---------------|
|                              | ... Bin 165 | ... Bin 238 | ... Bin 489 | ... Bin 567 | ... Bin 742 |              |               |
| <i>A. defectiva</i>          | -12(0.56)   | 6(0.3)      | -1(0.8)     | 8(0.23)     | 0(0)        | <b>-3.88</b> | <b>&lt;1%</b> |
| .                            |             |             |             |             |             |              |               |
| .                            |             |             |             |             |             |              |               |
| .                            |             |             |             |             |             |              |               |
| <i>E. cloacae</i>            | -12(0.56)   | -3(0.3)     | 7(0.8)      | 1(0.23)     | 0(0)        | <b>-1.79</b> | <b>&lt;1%</b> |
| <i>E. coli</i>               | -13(0.56)   | 9(0.3)      | 12(0.8)     | -17(0.23)   | 0(0)        | <b>1.11</b>  | <b>99.9%</b>  |
| <i>S. aureus</i>             | 14(0.56)    | 5(0.3)      | -15(0.8)    | 9(0.23)     | 0(0)        | <b>-0.59</b> | <b>36%</b>    |
| .                            |             |             |             |             |             |              |               |
| .                            |             |             |             |             |             |              |               |
| .                            |             |             |             |             |             |              |               |
| <i>Y. pseudotuberculosis</i> | 17(0.56)    | 7(0.3)      | -12(0.8)    | -17(0.23)   | 0(0)        | <b>-1.89</b> | <b>&lt;1%</b> |

A hypothetical example of spectral analysis results. In this case, the bin scores of the unknown go through an iterative process to determine a score and confidence value relative to each reference species in the database. Adapted from: van Nuenen, Marc. VITEK MS: Taking Microbial MALDI-TOF ID from Research into the Routine. Presentation to CDC on August 13, 2012.
